# Supplementary material for: Exosomal cargo including microRNA regulates sensory neuron to macrophage communication after nerve trauma
Source: Nat Commun. 2017 Nov 24;8:1778. doi: 10.1038/s41467-017-01841-5 (PMC5701122; doi:10.1038/s41467-017-01841-5)
Supplement: Supplementary file 1 — Supplementary Information [file 41467_2017_1841_MOESM1_ESM.pdf]

## Supplementary information

### Supplementary Tables

**Supplementary Table 1.** LNA-based miR-21-5p inhibitor and the relative scrambled control (mismatch sequence) were custom designed by Exiqon.

/5FAM/ indicates that the oligo is labeled with FAM at the 5' end. The asterisk \* indicates a phosphorothioate bond, which is an oligo backbone modification needed for *in-vivo* stability.

| Oligo_name          | Sequence                            |
|---------------------|-------------------------------------|
| miR-21-5p antagomir | /5FAM/T*C*A*G*T*C*T*G*A*T*A*A*G*C*T |
| Scrambled oligomer  | /5FAM/T*C*A*G*T*A*T*T*A*G*C*A*G*C*T |

**Supplementary Table 2.** Sequences of miRNAs analysed in this study provided by Exiqon.

| ID-miRBase Version 19.0 | Accession number | Mature sequence 5'-3'    |
|-------------------------|------------------|--------------------------|
| mmu-miR-21a-5p          | MIMAT0000530     | UACUUAUCAGACUGAUGUUGA    |
| mmu-let-7b-5p           | MIMAT0000522     | UGAGGUAGUAGGUUGUGUGGUU   |
| mmu-miR-124-3p          | MIMAT0000134     | UAAGGCACGCGGUGAAUGCC     |
| mmu-miR-134-5p          | MIMAT0000146     | UGUGACUGGUUGACCAGAGGGG   |
| mmu-miR-155-5p          | MIMAT0000165     | UUA AUGCUAAUUGUGAUAGGGGU |

23 **Supplementary Table 3.** Sequences of primers for real-time PCR analysed in this study and  
 24 provided by Sigma Aldrich.

25

| Target gene   | Forward primer               | Reverse primer             | Accession Number |
|---------------|------------------------------|----------------------------|------------------|
| <i>Actb</i>   | 5'- GGCTGTATTCCCCTCCATCG     | 5'- CCAGTTGGTAACAATGCCATGT | NM_007393.5      |
| <i>Arg1</i>   | 5'-GTGAAGAACCCACGGTCTGT      | 5'-CTGGTTGTCAGGGGAGTGTT    | NM_007482.3      |
| <i>Dicer1</i> | 5'- GATGCAGCCTCTAATAGAAAAG   | 5'- CTGTAGCTCCGGCCAACAC    | NM_148948.2      |
| <i>Gapdh</i>  | 5'-ACTCCACTCACGGCAAATTCAACGG | 5'-AGGGGCGGAGATGATGACCC    | NM_001289726     |
| <i>Mrc1</i>   | 5'-CAGGTGTGGGCTCAGGTAGT      | 5'-TGTGGTGAGCTGAAAGGTGA    | NM_008625.2      |
| <i>Nos2</i>   | 5'-GGCAAACCCAAGGTCTACGTT     | 5'-CTCAAGTTCAGCTTGGT       | NM_010927.4      |
| <i>Rela</i>   | 5'-CTTGGCAACAGCACAGACC       | 5'-GAGAAGTCCATGTCCGCAAT    | NM_009045.4      |
| <i>Spry2</i>  | 5'-GGTTGGTGCAAAGCCGCGAT      | 5'-AGGGCATCTCTTGGATCCGGC   | NM_011897.3      |

26

27

28

29

30

31

32

33

34

35

## Supplementary Figures

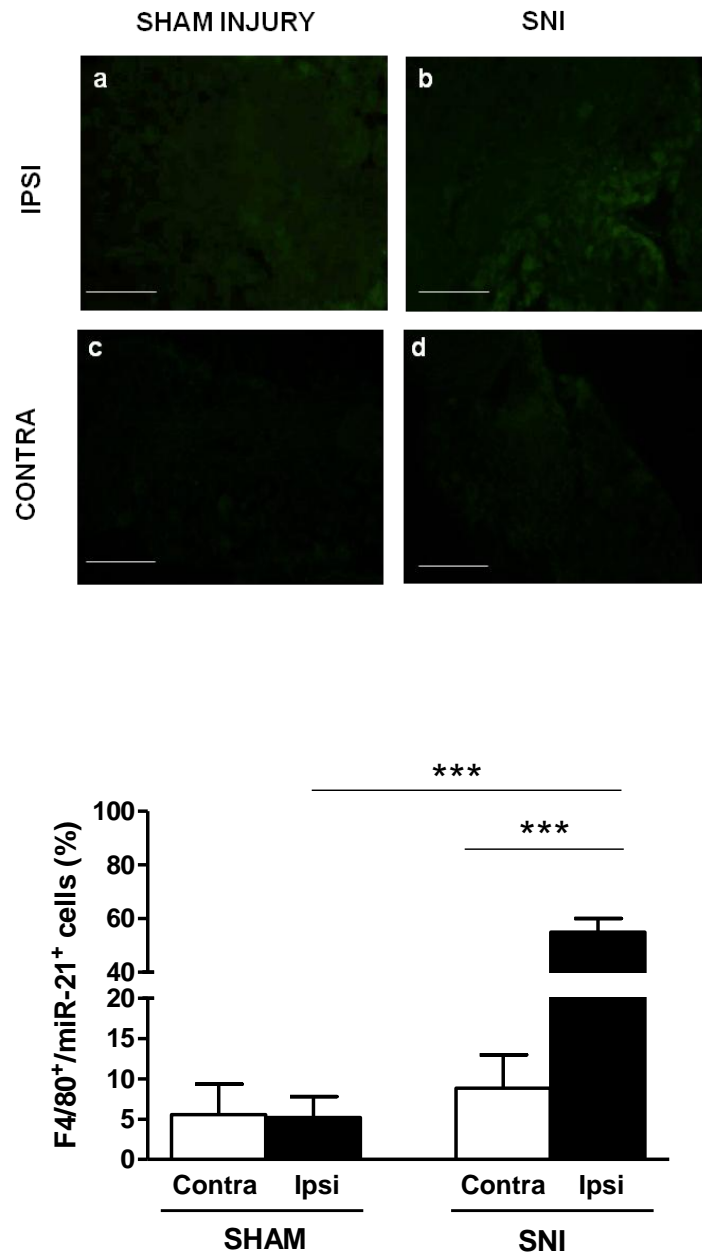

**Supplementary Figure 1. No miR-21 expression is detected in DRG using scrambled probe. F4/80<sup>+</sup>/miR-21<sup>+</sup> cell number is increased in DRG neurons following SNI injury.** (a-d) miR-21 scrambled probe expression by fluorescence *in situ* hybridisation (FISH) in ipsilateral, contralateral L5 DRG neurons 7 days after sham and spared nerve injury (SNI). Scale bar = 100  $\mu$ m. (e) Quantification of F4/80<sup>+</sup> cells (macrophages) that also express miR-21 in L4/5 DRG. Data are means  $\pm$  S.E.M., n=3 mice/ group. \*\*\* $P$ <0.001, one-way ANOVA, post-hoc Bonferroni.

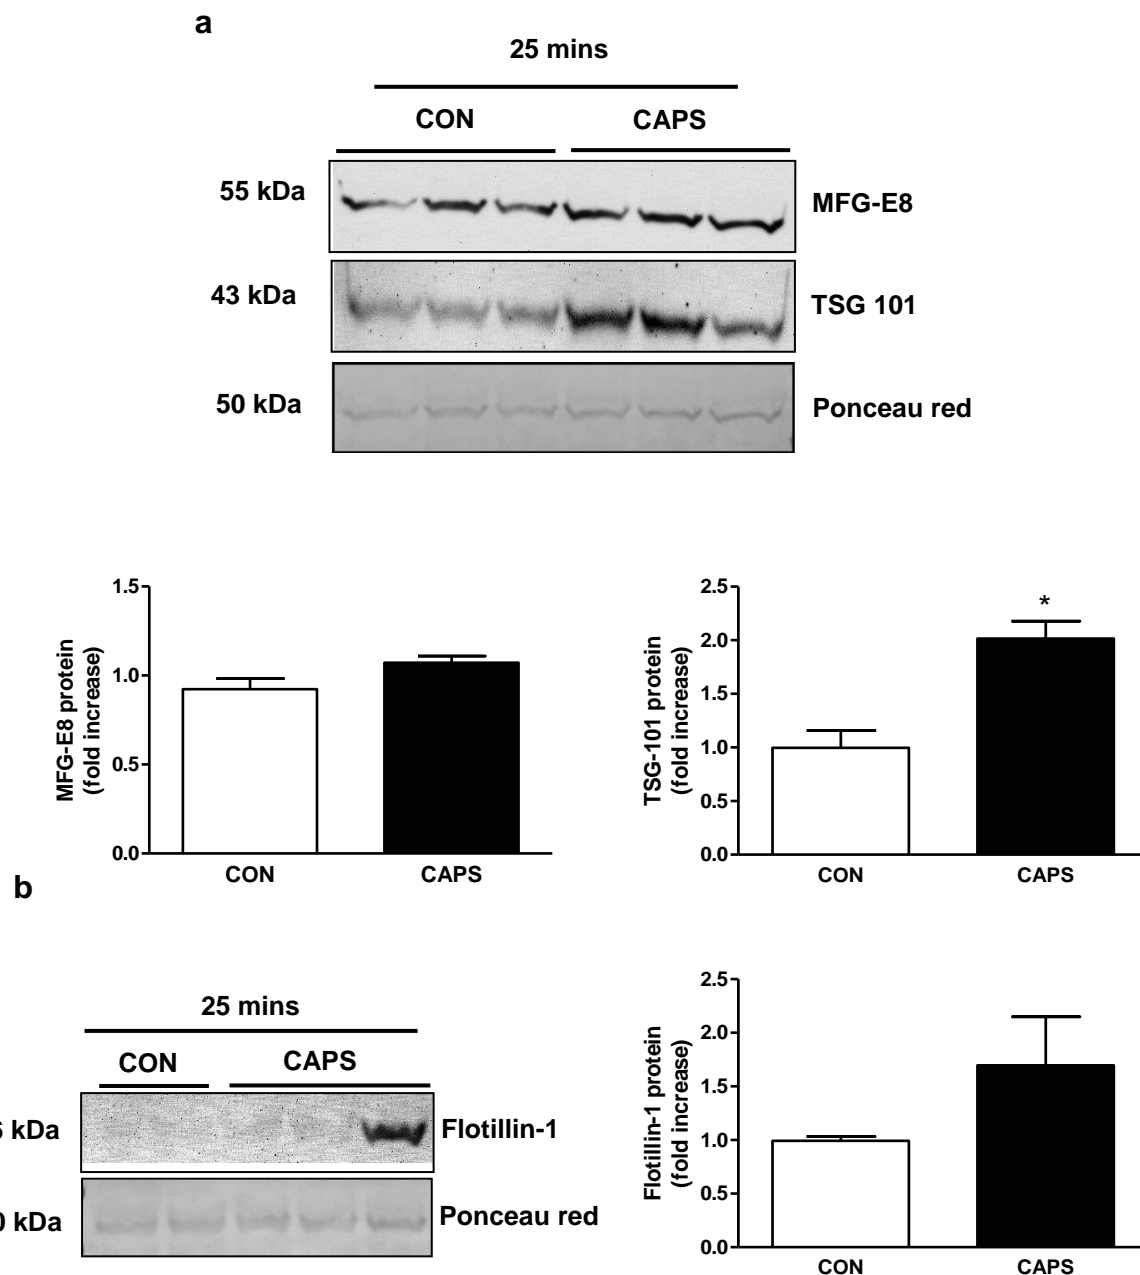

**Supplementary Figure 2. Short incubation of DRG neurons with capsaicin induces a significant increase in the expression of the exosomal marker TSG101, but not MFG-E8 and Flotillin-1.** Representative Western blot and quantification of protein expression for the exosomal markers MFG-E8, TSG101 (a) and Flotillin-1 (b) in the culture media of DRG neurons incubated with HEPES buffer+glucose (1mg/ml) (CON) or Capsaicin (1  $\mu$ M; CAPS) for 25 minutes. Data are means  $\pm$  S.E.M., n=3 cultures; \* $P$ <0.05, Student's  $t$  test.

**a**

**3 hours**

**COM**

**KCI**

**KCI**

50 mM

55 kDa

**MFG-E8**

46 kDa

## Flotillin-1

43 kDa

## TSG 101

50 kDa

### Ponceau red

**b**

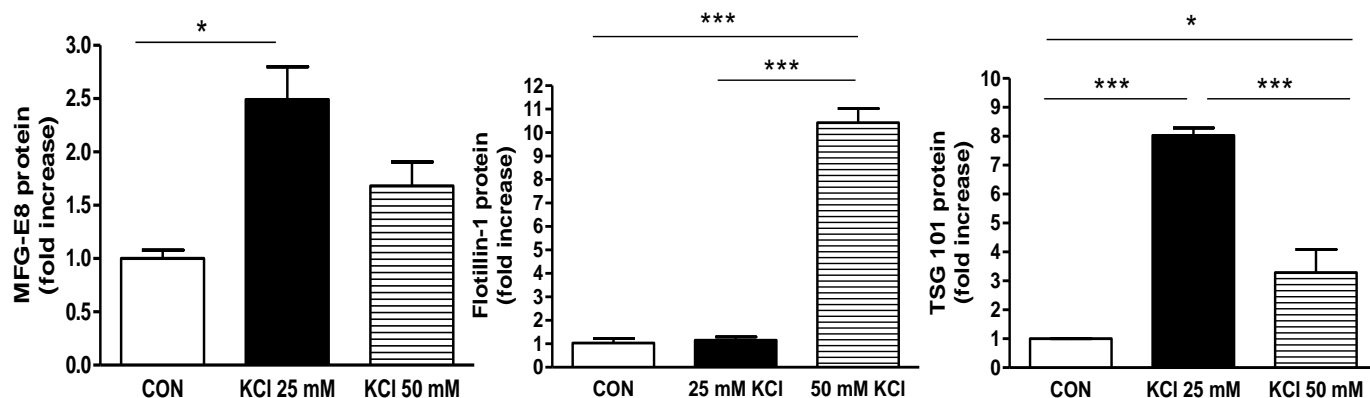

**Supplementary Figure 3. DRG neurons in culture release exosomes following potassium chloride incubation.** (a) Representative Western blots and (b) quantification of protein expression for the exosomal markers TSG101, Flotillin-1 and MFG-E8 in the culture media of DRG neurons incubated with HEPES buffer+glucose (1mg/ml) (CON) or with 25 mM KCl or 50 mM KCl for 3 hours. Data are means  $\pm$  S.E.M., n=4 cultures; \* $P$ <0.05 and \*\*\* $P$ <0.001, one-way ANOVA, post-hoc Bonferroni.

a

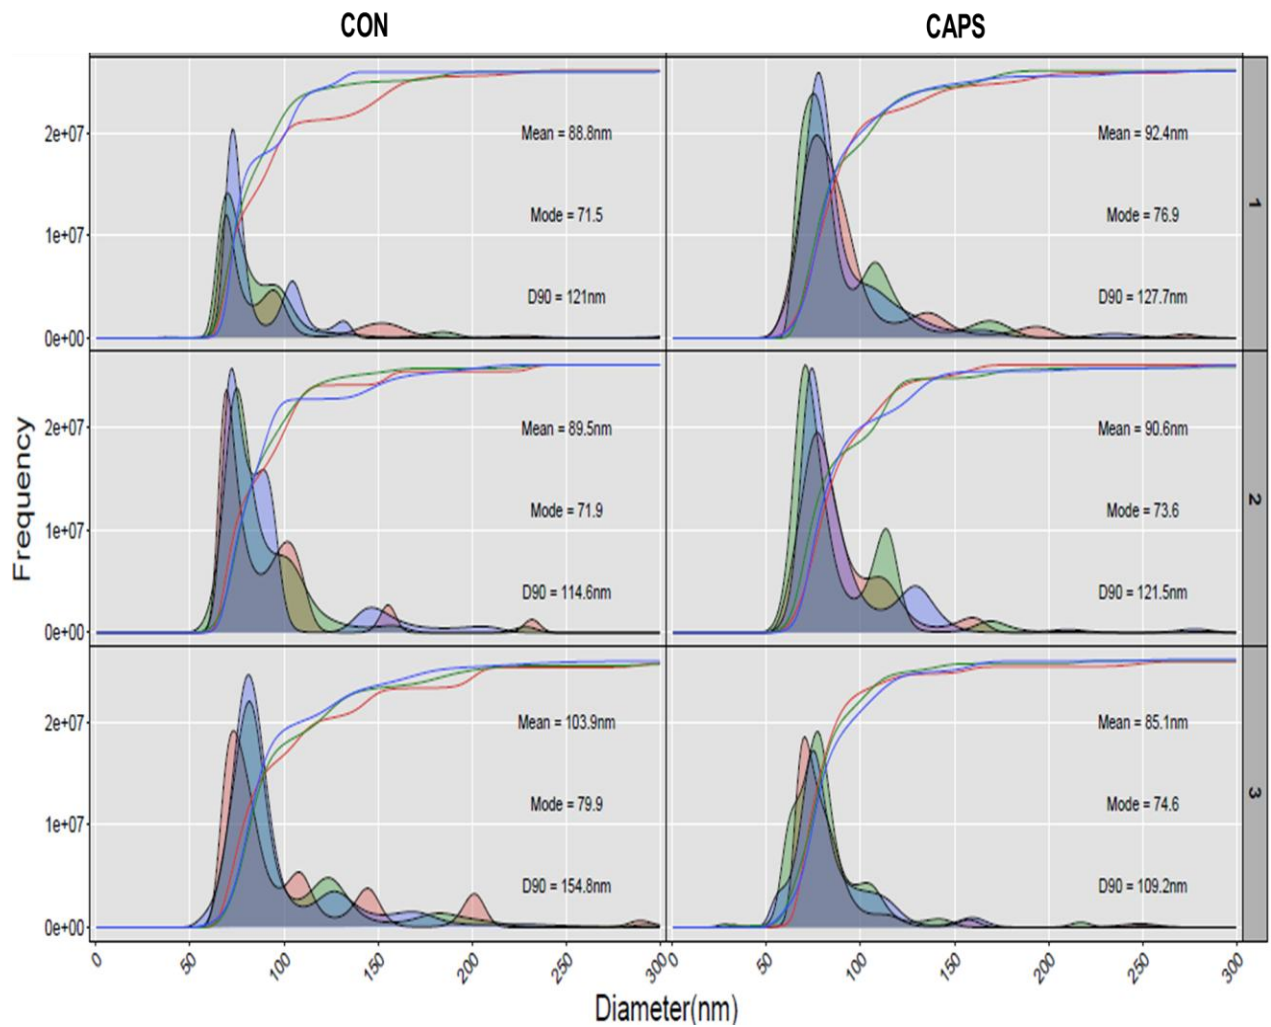

b

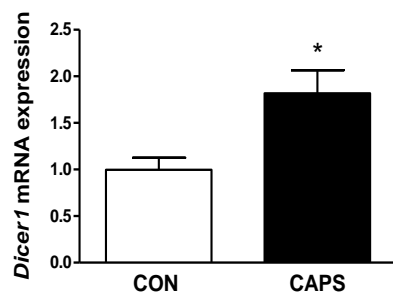

c

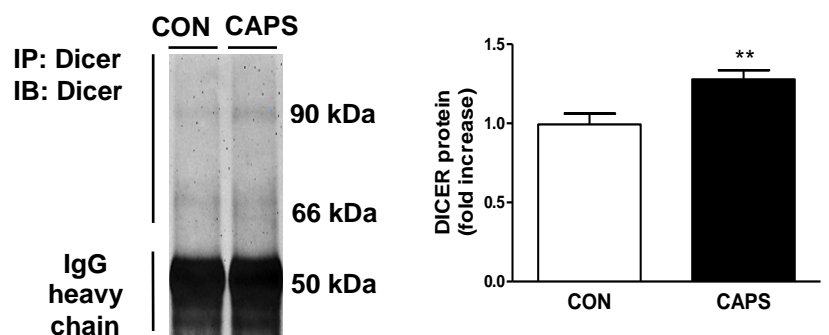

**Supplementary Figure 4. Incubation of sensory neurons with capsaicin induces release of EVs including exosomes and an intracellular increase of Dicer. (a)** Nanosight detection of exosomes isolated from culture media of neurons incubated with buffer control (CON) or CAPS for 3 hours. A triplicate for each condition is reported. The inset corresponds to the mean diameter and mode diameter and D90 values represent the

diameter of 90% of the particles. Exosomes levels were determined by the number of particles comprised between 30 nm and 120 nm. Expression of *Dicer* mRNA (b) and protein (c) in cultured DRG treated with control buffer or CAPS for 3 hours. Data are means  $\pm$  S.E.M., n=6; \* $P$ <0.05 and \*\* $P$ <0.01 compared to control, Student's  $t$  test.

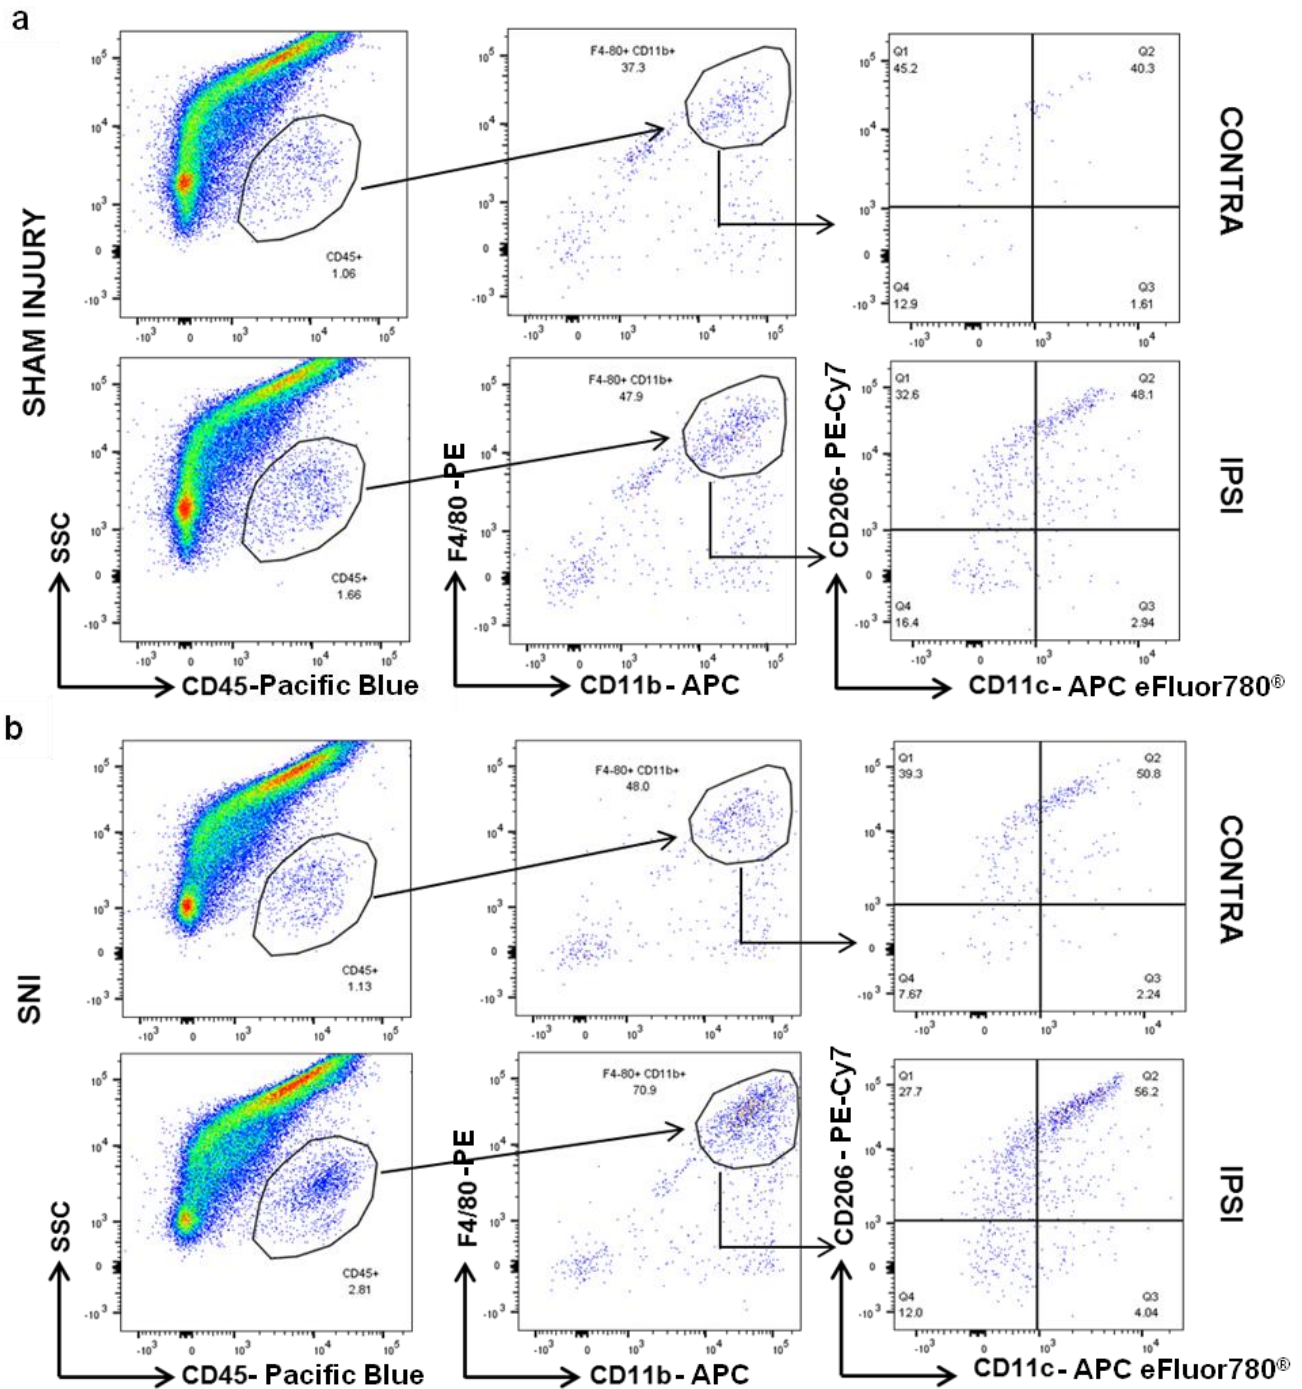

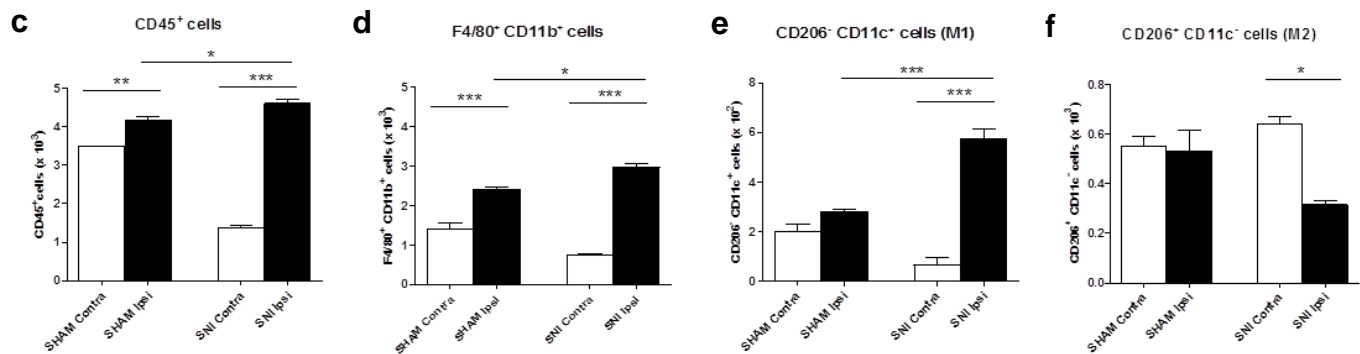

**Supplementary Figure 5. Spared nerve injury induces an increase of immune cells recruitment in DRG.** Representative scatterplots of immune cells sorted from pools of contralateral and ipsilateral L4 and L5 DRG obtained from SHAM injured (a) or SNI mice (b). Cells were gated on CD45<sup>+</sup>, F4/80<sup>+</sup> and CD11b<sup>+</sup>. Macrophages were defined as CD11b<sup>+</sup> F4/80<sup>+</sup> and were further analysed for the M2 (CD206<sup>+</sup> CD11c<sup>-</sup>) and M1 (CD206<sup>-</sup> CD11c<sup>+</sup>) phenotypes. Numbers in gates refer to percentage of positive cells for each specific marker. (c) Bar charts represent absolute number in DRG of leukocyte (CD45<sup>+</sup>), (d) macrophages (F4/80<sup>+</sup> CD11b<sup>+</sup>), (e) M1 macrophages (CD206<sup>-</sup> CD11c<sup>+</sup>) and (f) M2 macrophages (CD206<sup>+</sup>CD11c<sup>-</sup>). Flow cytometry analysis was performed on data from 4 independent experiments. Data are expressed as means  $\pm$  S.E.M., n=4 for each group. \* $P$ <0.05, \*\* $P$ <0.01 and \*\*\* $P$ <0.001, one-way ANOVA, post-hoc Bonferroni.

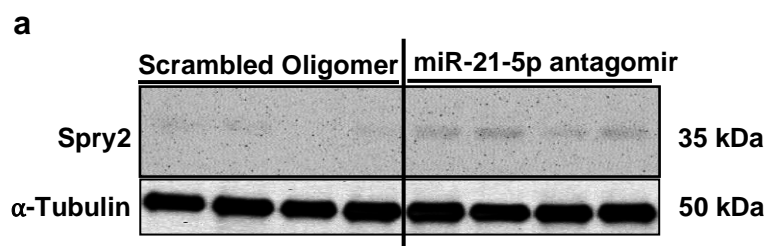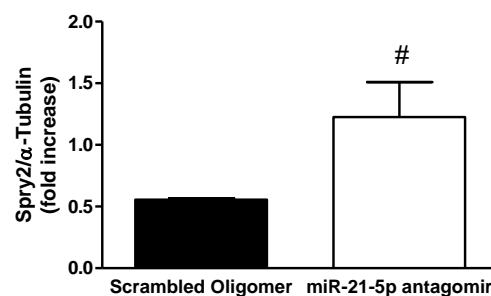

**b**

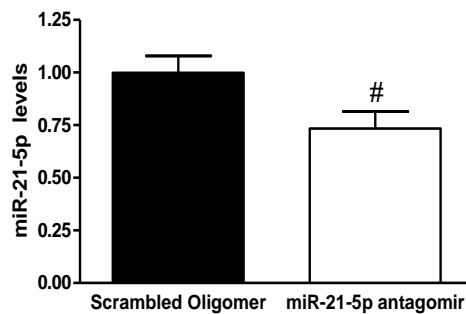

**Supplementary Figure 6. Effect of intrathecal delivery of miR-21-5p antagomir and scrambled oligomer on Sprouty2 protein and miR-21-5p expression.** Intrathecal cannulation and osmotic pump implantation were performed on day 0 and the delivery of miR-21-5p antagomir or scrambled control started on the same day. After 7 days, efficient delivery of miR-21-5p antagomir to L4 and L5 DRG was confirmed by up-regulation of Spry2 protein expression (**a**) and down-regulation of miR-21-5p levels (**b**). Data are expressed as means  $\pm$  S.E.M.,  $n = 3-4$  mice for each group.  $\#P < 0.05$  compared to scrambled oligomer, Student's  $t$  test.

**Scrambled Oligomer**

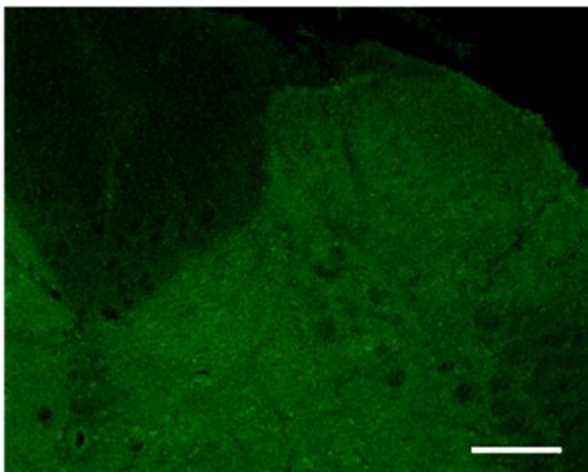

**miR-21-5p antagomir**

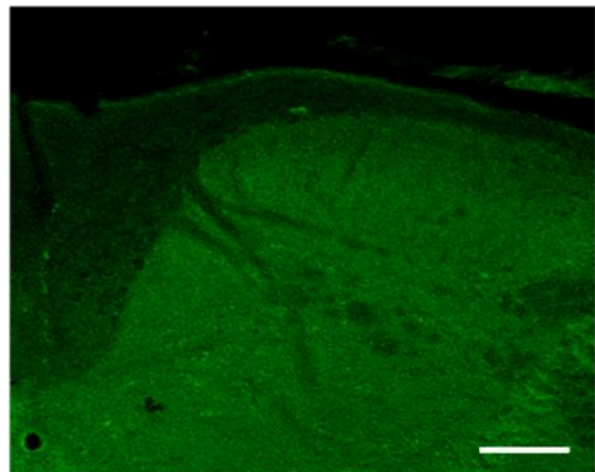

**Supplementary Figure 7. miR-21-5p antagomir and scrambled oligomer are not retained by spinal cord neurons following intrathecal administration.** Representative confocal images of cryo-sections of lumbar spinal cord taken from SHAM injured and SNI mice treated intrathecally for 7 days with miR-21 antagomir or scrambled oligomer. FAM signal was not detected. Scale bar represents 50  $\mu$ m.

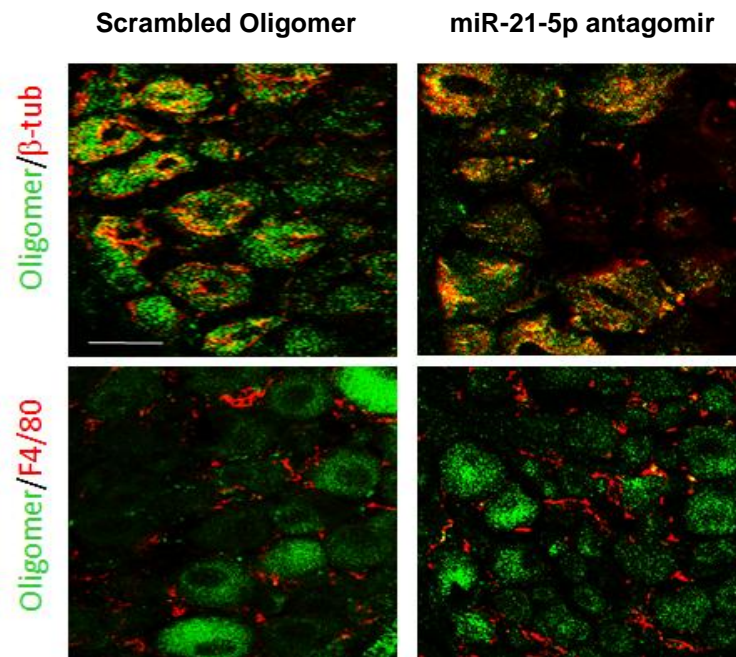

**Supplementary Figure 8. Scrambled oligomer and miR-21-5p antagomir distribution in L4, L5 contralateral dorsal root ganglia.** Both intrathecally-delivered scrambled oligomer and antagomir (green) co-localize with the neuronal marker  $\beta$ -tubulin (red) to a greater extent than macrophage marker F4/80<sup>+</sup> (red). Scale bar= 50  $\mu$ m.

179

a

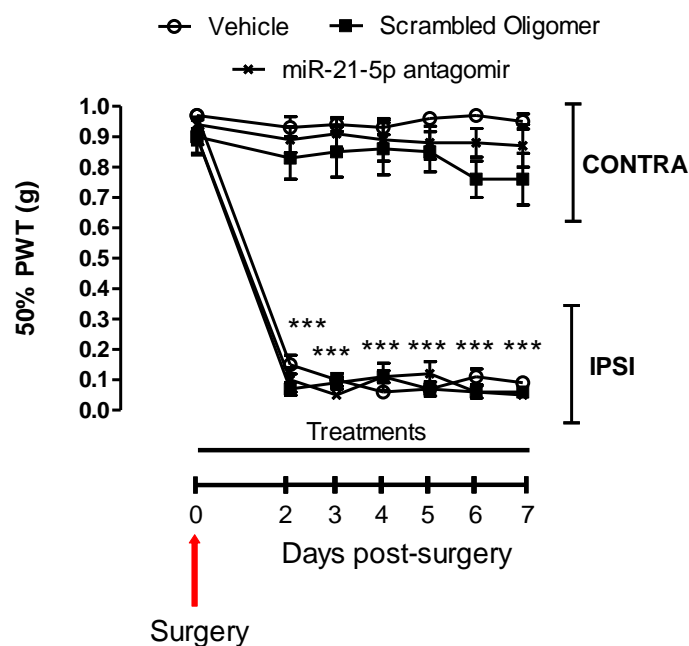

180

181

b

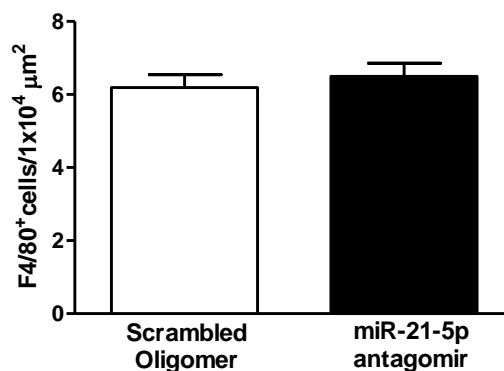

182

183 **Supplementary Figure 9. Systemic delivery of miR-21 antagonist does not prevent**  
 184 **mechanical hypersensitivity.** (a) Effect of continuous subcutaneous delivery of the miR-21-  
 185 5p antagonist (12 pmol/day) for 7 days on the development of mechanical hypersensitivity.  
 186 No differences were observed between miR-21-5p antagonist, scrambled oligomer and  
 187 vehicle groups. Data are presented as 50% of paw withdrawal thresholds (PWT); means ±  
 188 S.E.M., n = 6 mice/group. \*\*\*P<0.001 compared to the corresponding contralateral paw, two-  
 189 way ANOVA followed by Tukey test. (b) Quantification of F4/80<sup>+</sup> cells in L5 DRG ipsilateral  
 190 to injury following systemic delivery of either the scrambled oligomer or miR-21-5p  
 191 antagonist. Data are means ± S.E.M., n=4 mice/group.

192

193 **a**

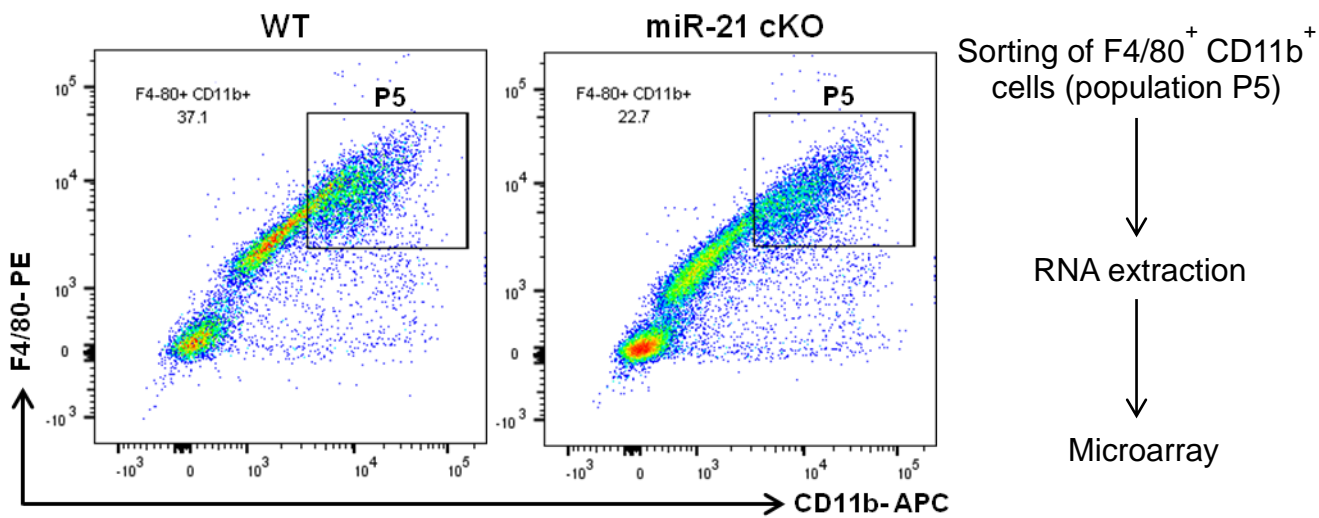

194

195 **b**

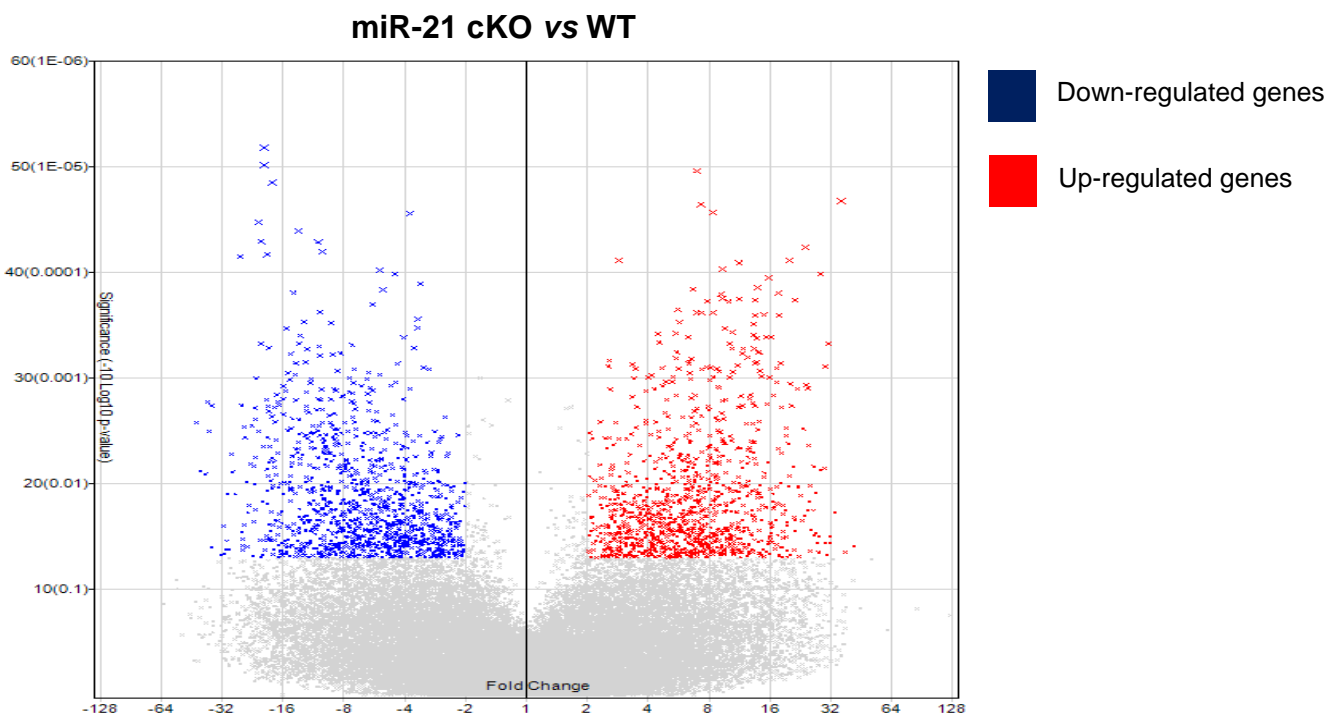

203

c

## Top 10 significant modified pathways

| #  | Maps                                                                                              | 0 | 0.5 | 1 | 1.5 | 2 | 2.5 | 3 | 3.5 | -log(pValue) | pValue ↑ |
|----|---------------------------------------------------------------------------------------------------|---|-----|---|-----|---|-----|---|-----|--------------|----------|
| 1  | Signal transduction Calcium signaling                                                             |   |     |   |     |   |     |   |     |              | 3.899e-5 |
| 2  | Apoptosis and survival TNF-alpha-induced Caspase-8 signaling                                      |   |     |   |     |   |     |   |     |              | 1.128e-4 |
| 3  | Cytoskeleton remodeling Substance P mediated membrane blebbing                                    |   |     |   |     |   |     |   |     |              | 1.607e-4 |
| 4  | Cytoskeleton remodeling TGF, WNT and cytoskeletal remodeling                                      |   |     |   |     |   |     |   |     |              | 1.625e-4 |
| 5  | Neurophysiological process Receptor-mediated axon growth repulsion                                |   |     |   |     |   |     |   |     |              | 1.694e-4 |
| 6  | Regulation of lipid metabolism RXR-dependent regulation of lipid metabolism via PPAR, RAR and VDR |   |     |   |     |   |     |   |     |              | 1.985e-4 |
| 7  | G-protein signaling G-Protein alpha-12 signaling pathway                                          |   |     |   |     |   |     |   |     |              | 2.138e-4 |
| 8  | NF-AT signaling in cardiac hypertrophy                                                            |   |     |   |     |   |     |   |     |              | 2.541e-4 |
| 9  | Apoptosis and survival Ceramides signaling pathway                                                |   |     |   |     |   |     |   |     |              | 3.239e-4 |
| 10 | Cytoskeleton remodeling Role of PKA in cytoskeleton reorganisation                                |   |     |   |     |   |     |   |     |              | 3.239e-4 |

d

| Known miR-21-5p Target Genes |                         |                      | cKO_vs_WT_ipsi | References (PMID): |
|------------------------------|-------------------------|----------------------|----------------|--------------------|
| Symbol                       | Full name               | Object type          | P 0.05_FC 2 2  |                    |
| <i>Acta2</i>                 | Alpha-actin-2           | Binding protein      | 2.73 fold      | 28515040;19561119  |
| <i>Tpm1</i>                  | Tropomyosin-1           | Binding protein      | 6.37 fold      | 19253296;17363372  |
| <i>Znf 288</i>               | Zinc finger protein 288 | Transcription factor | 12.69 fold     | 28707457           |

**Supplementary Figure 10. Conditional deletion of miR-21 in sensory neurons is associated with gene changes in macrophages isolated from L4/L5 ipsilateral DRG.** (a) Schematic strategy adopted to perform a microarray analysis (MA) on the F4/80<sup>+</sup> CD11b<sup>+</sup> macrophages (population P5) isolated from a pool of ipsilateral L4/L5 DRG in spared nerve injured WT and miR-21 cKO (n=5 mice/group). (b) MA plot of significance (-10 Log<sub>10</sub> P-value) vs fold changes in miR-21 cKO macrophages (n=3 replicates) compared to WT macrophages (n=3 replicates). (c) List of top 10 significant regulated pathways in miR-21 cKO macrophages compared to WT macrophages analysed using a MetaCore™ software. (d) Table of known miR-21 target genes significantly upregulated in miR-21 cKO macrophages with a fold change cut-off of 2.2.

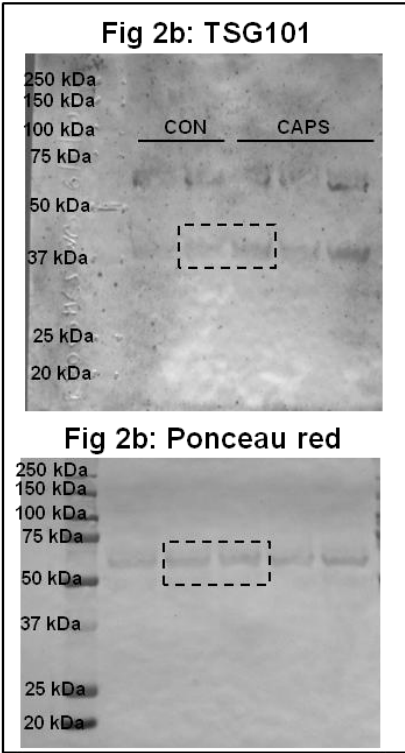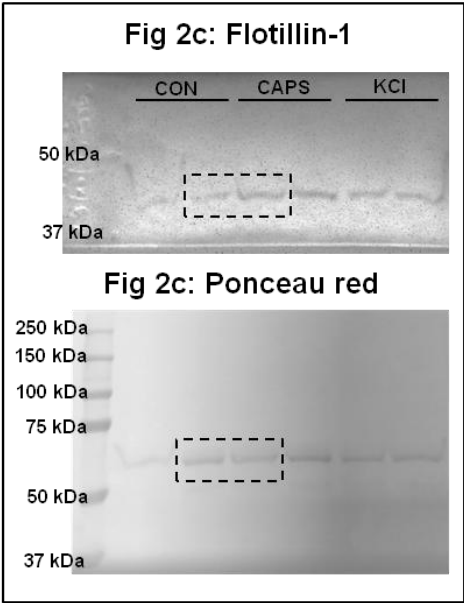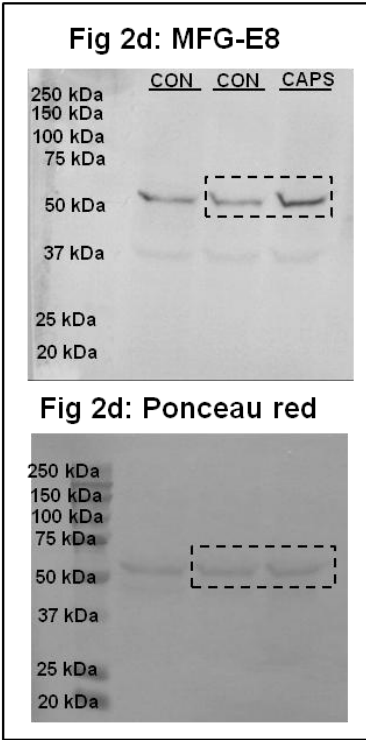

225

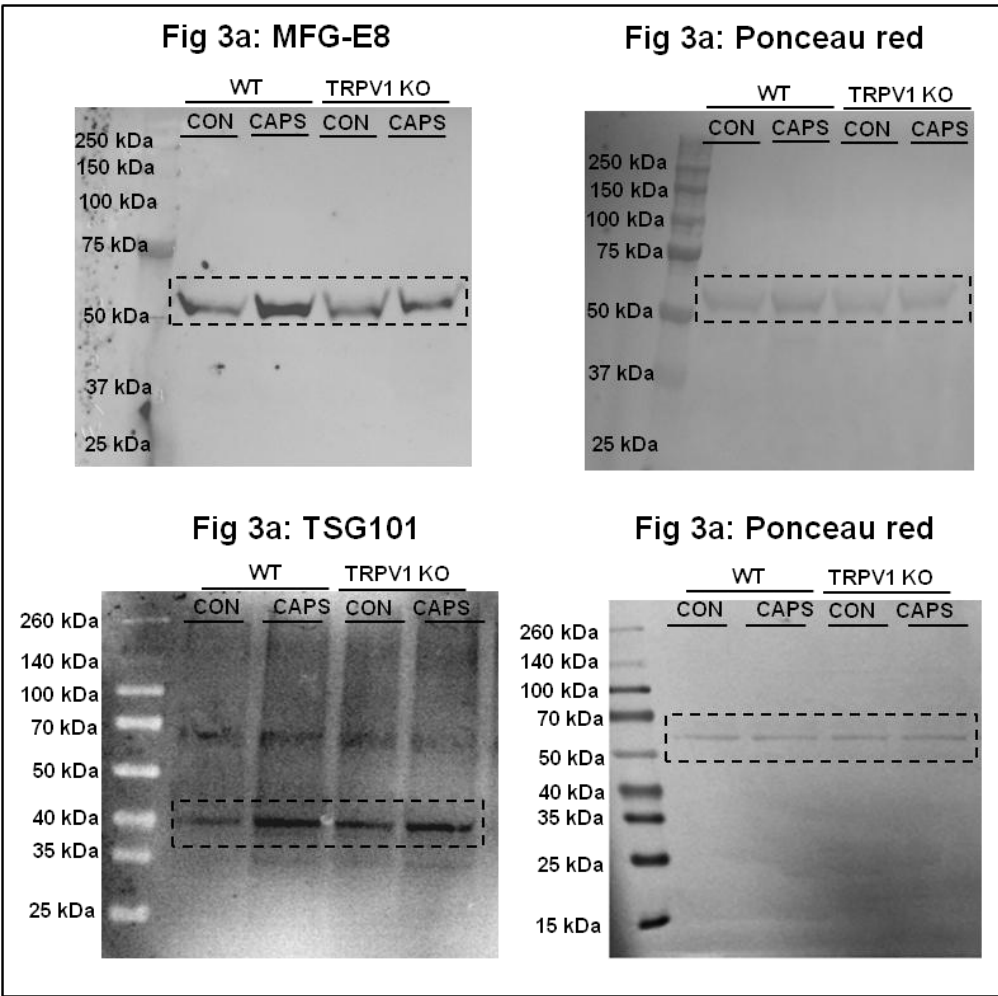

226

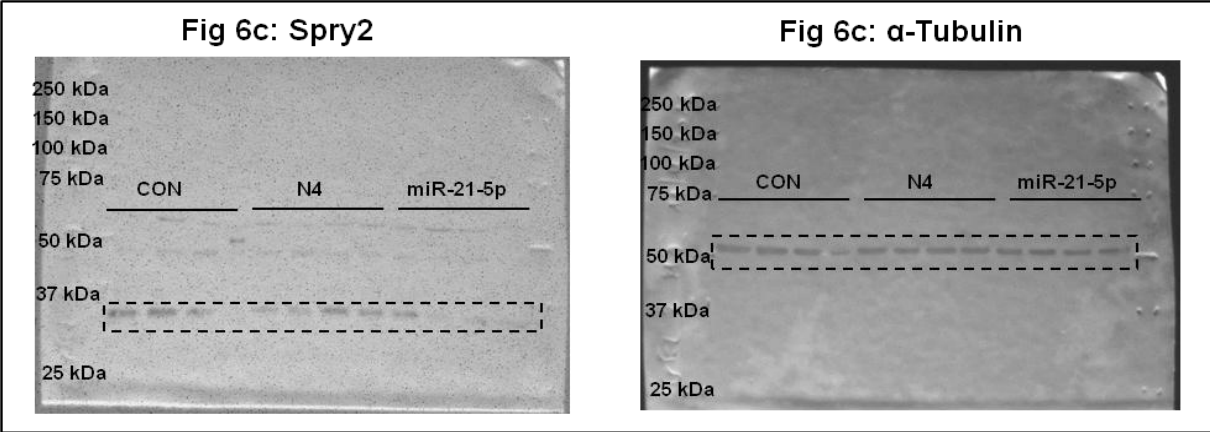

227

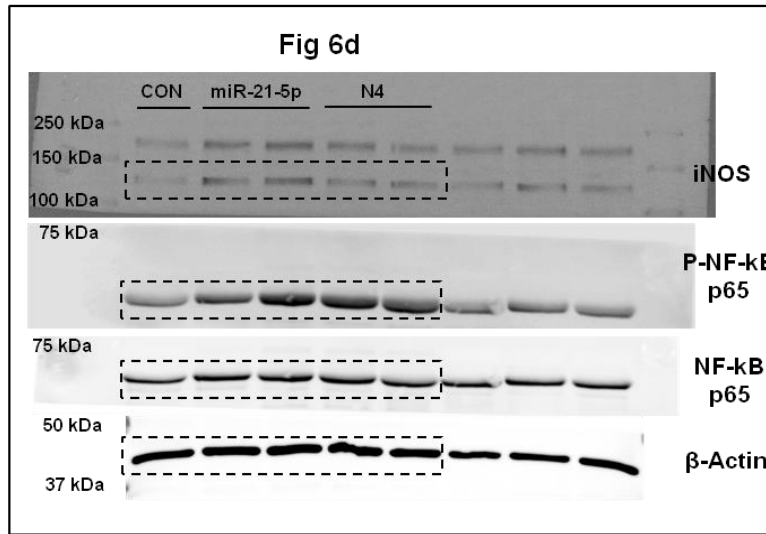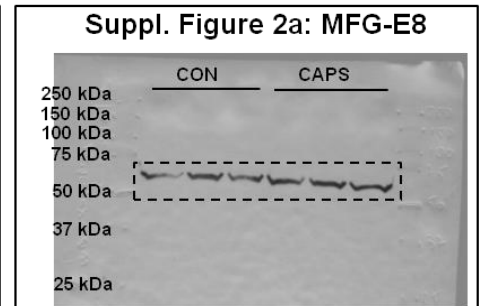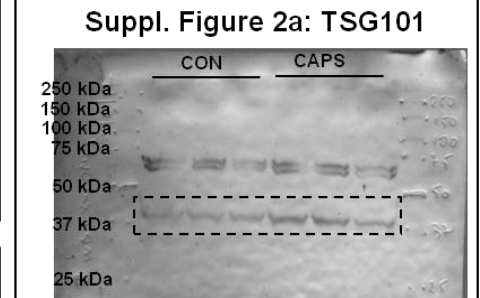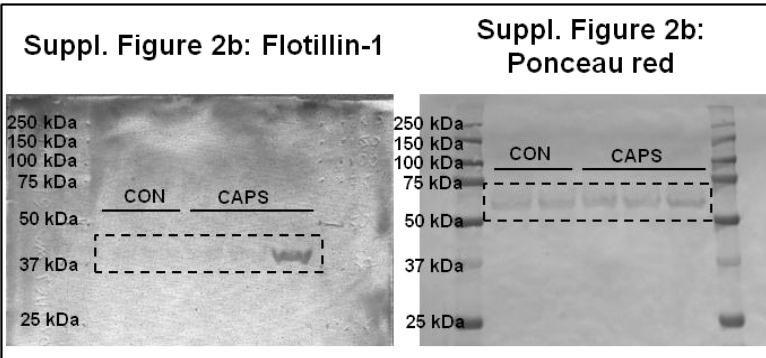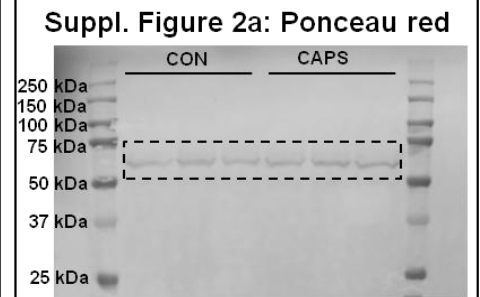

228

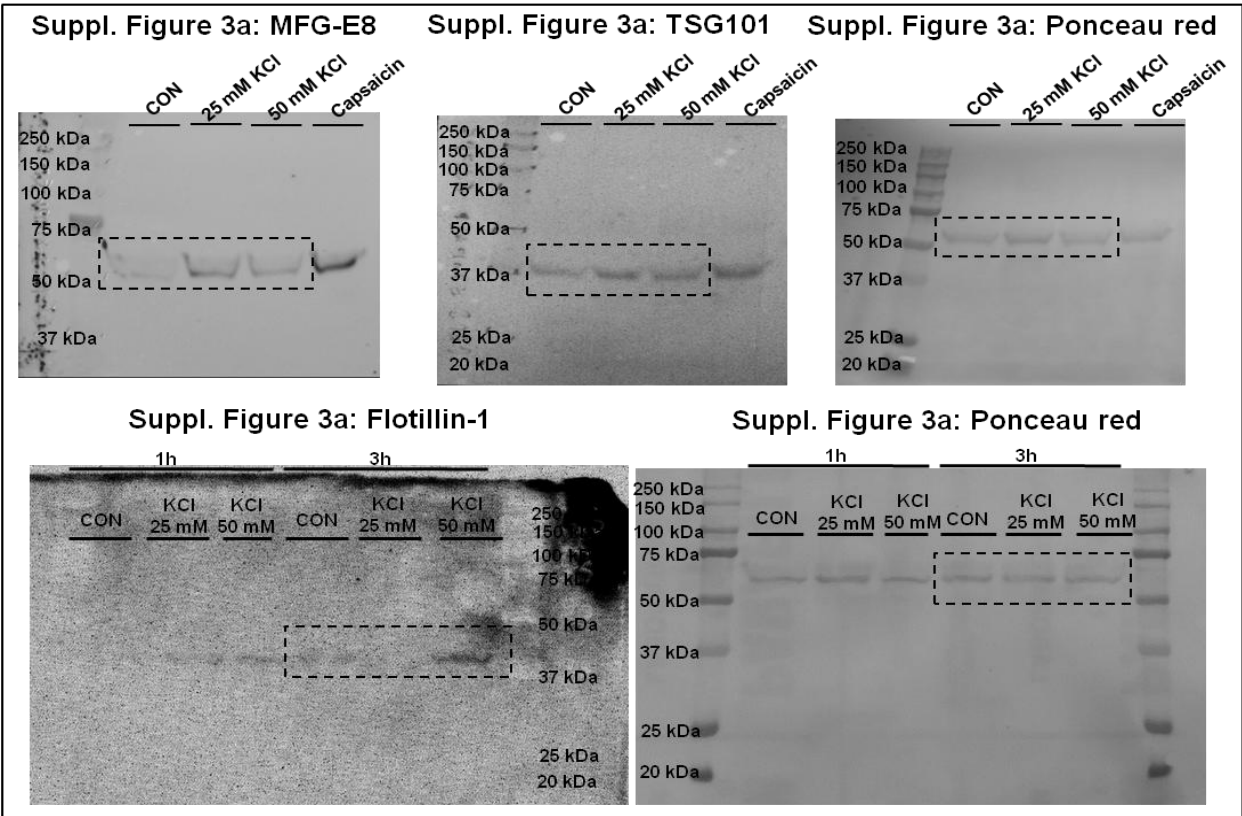

229

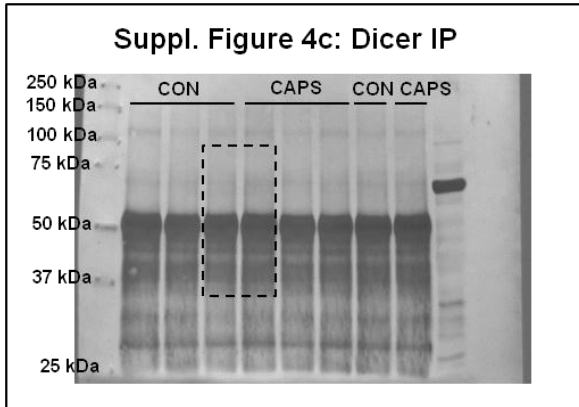

230

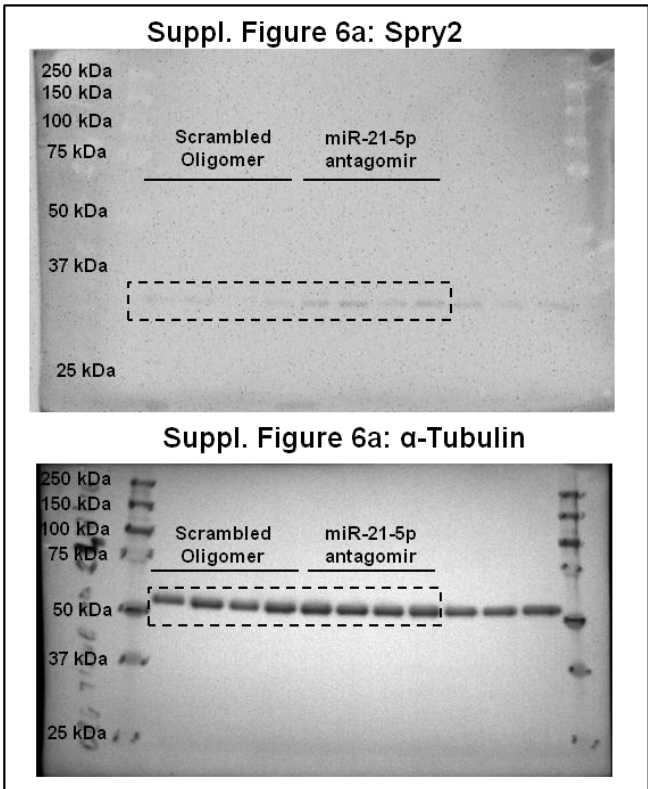

231 **Supplementary Figure 11. Uncropped images of Western blot figures shown in the**  
 232 **main paper and the Supplementary Figures.**

233
